# Supplementary material for: Guest modulating the photoactivity of a titanium-oxide cage
Source: Royal Society of Chemistry journal article supplement (doi:10.1039/d4sc04983g), 2024-01-01
Supplement: d4sc04983g1.pdf [file d4sc04983g1.pdf]

The figures, schemes, and charts in the SI are shown as follows:

Figure S1:

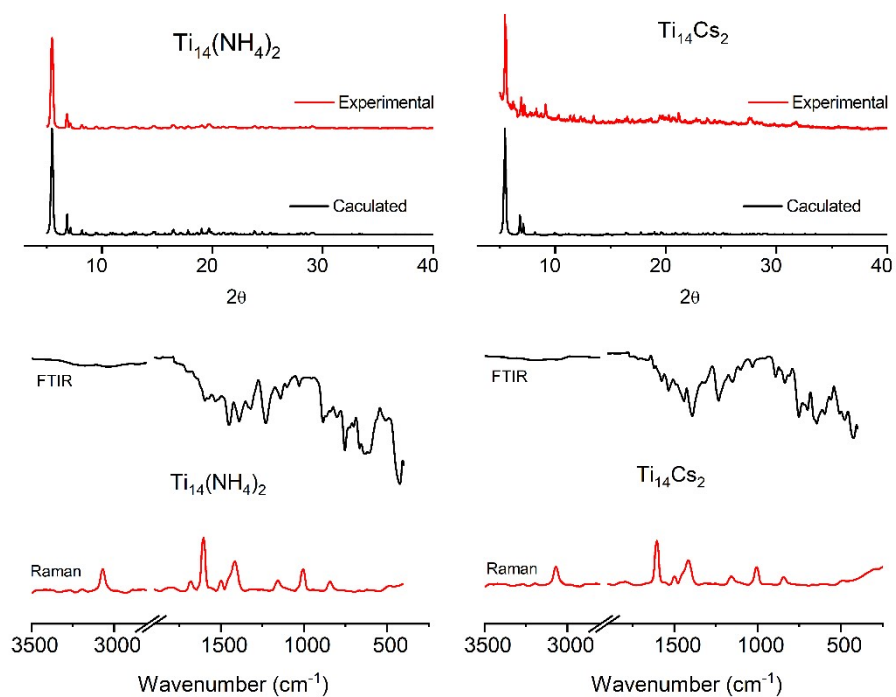

Figure S2:

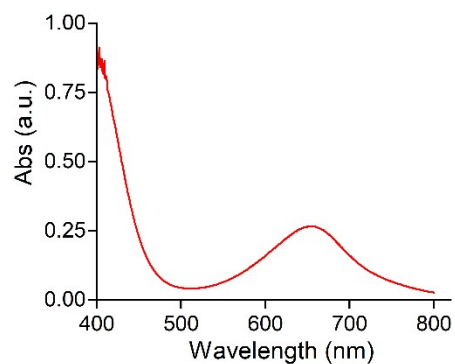

Figure S3:

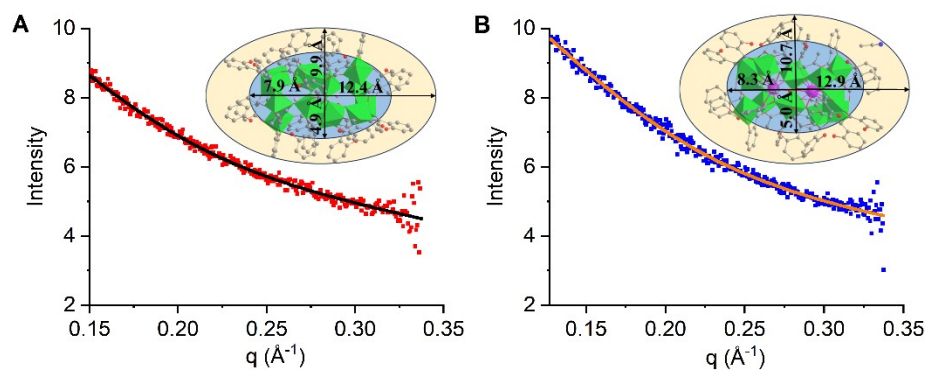

Figure S4:

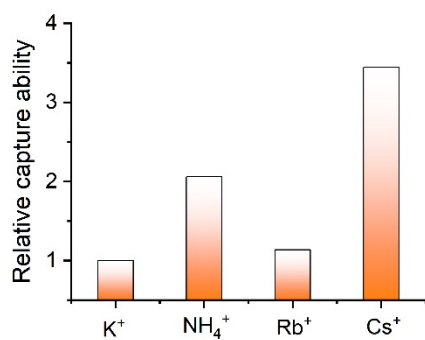

Figure S5:

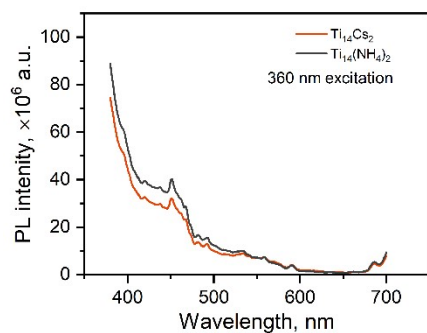

Figure S6:

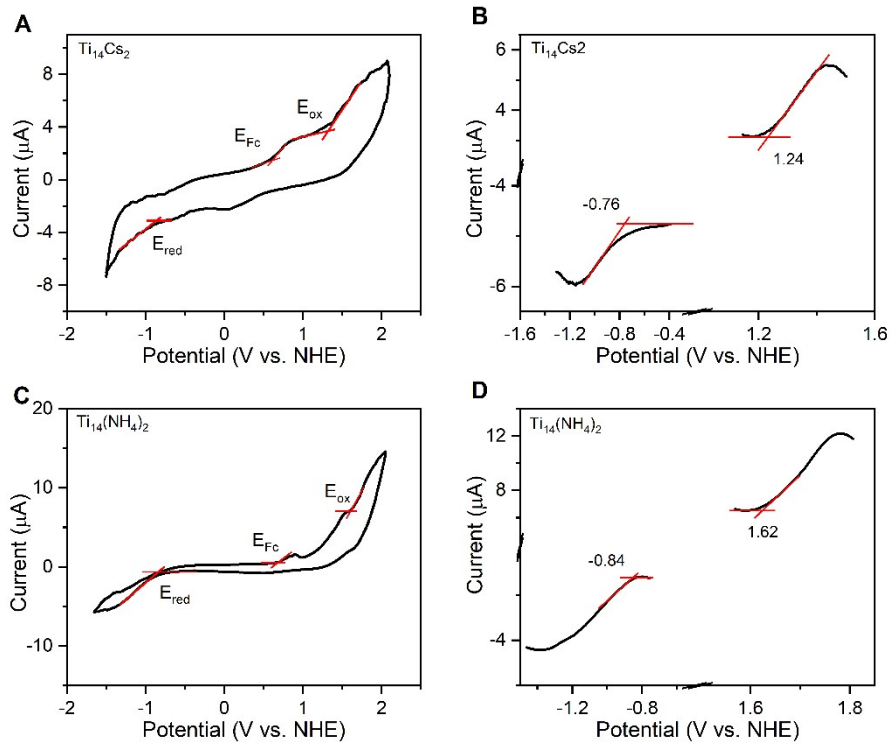

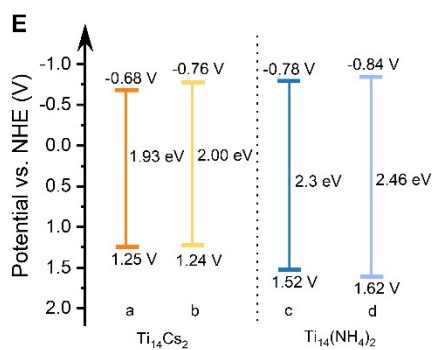

Figure S7:

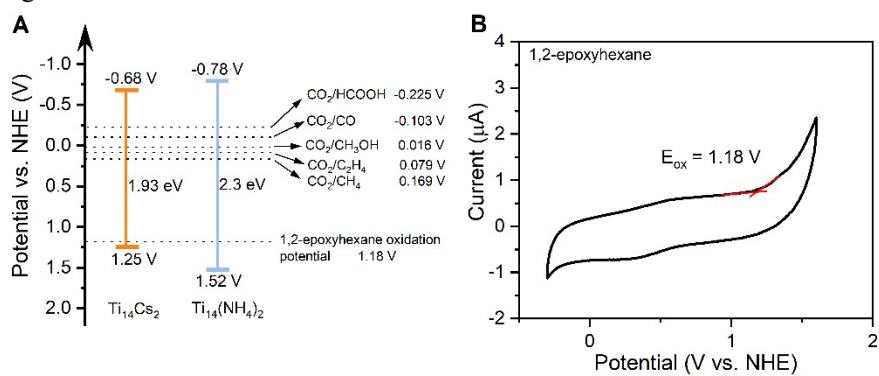

Figure S8:

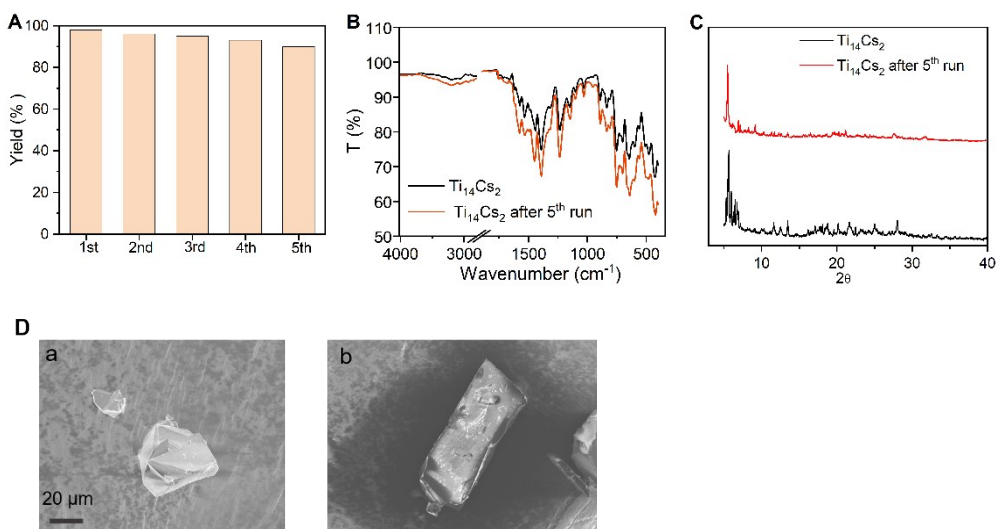

Figure S9:

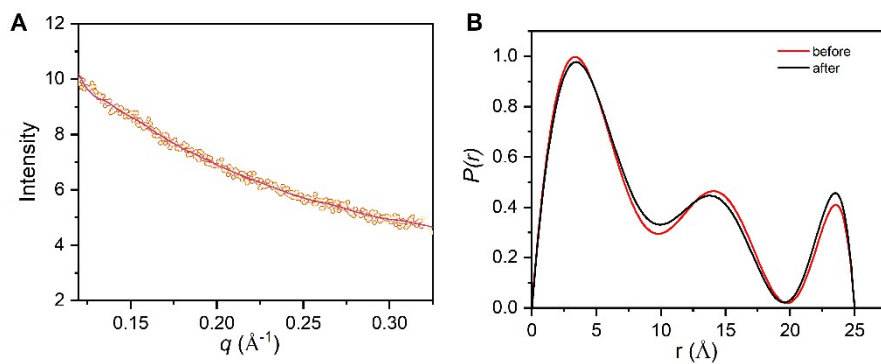

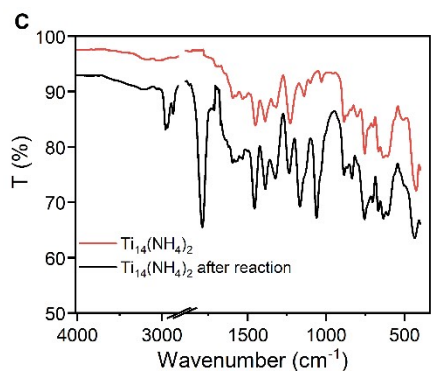

Figure S10:

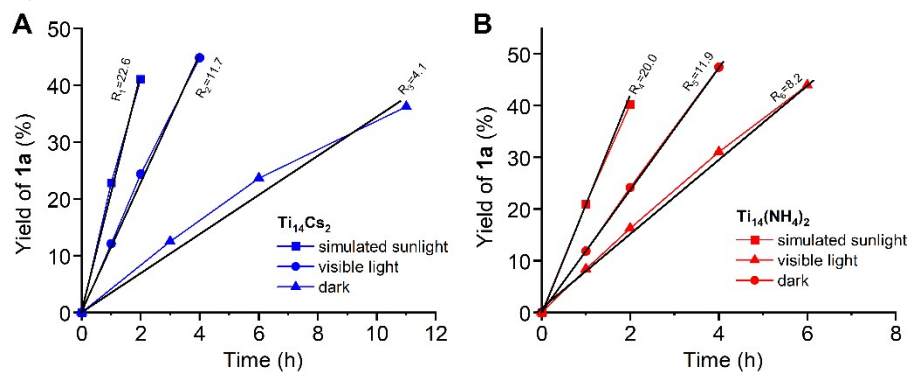

Figure S11:

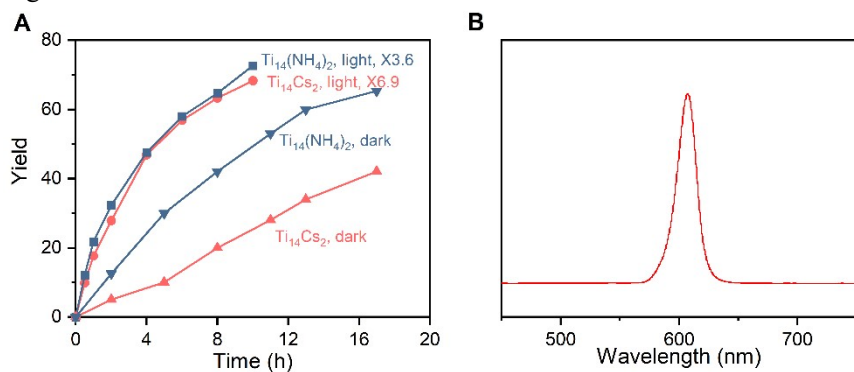

Figure S12:

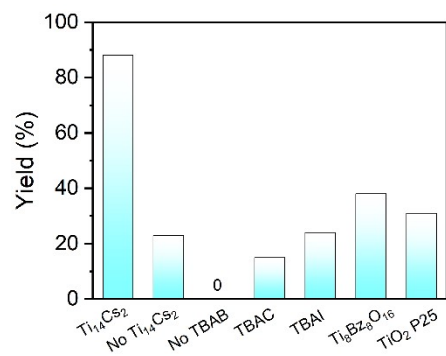

Figure S13:

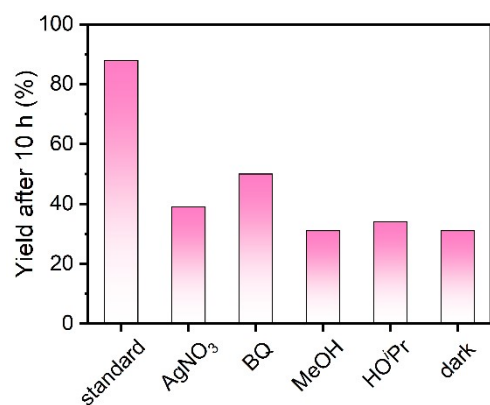

Figure S14:

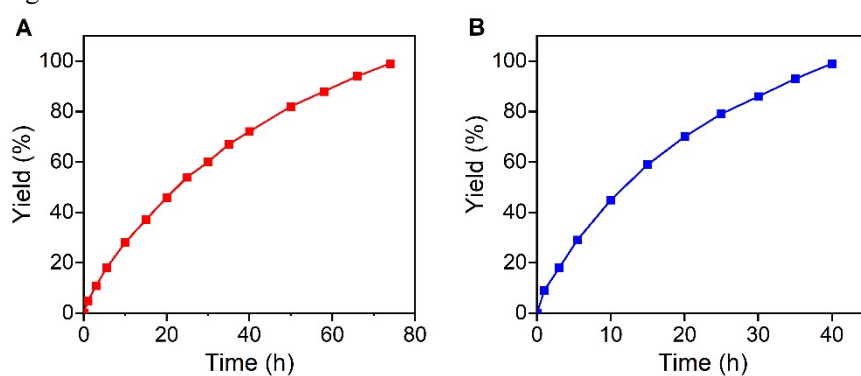

Table S1.:

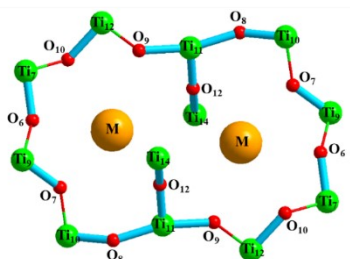

| <b>Ti<sub>14</sub>Cs<sub>2</sub></b> |                 |             | <b>Ti<sub>14</sub>(NH<sub>4</sub>)<sub>2</sub></b> |                 |             |
|--------------------------------------|-----------------|-------------|----------------------------------------------------|-----------------|-------------|
| Atom 1                               | Atom 2          | Bond length | Atom 1                                             | Atom 2          | Bond length |
| Ti <sub>11</sub>                     | O <sub>12</sub> | 1.7428      | Ti <sub>11</sub>                                   | O <sub>12</sub> | 1.7366      |
|                                      | O <sub>8</sub>  | 1.9277      |                                                    | O <sub>8</sub>  | 1.9249      |
|                                      | O <sub>9</sub>  | 1.9331      |                                                    | O <sub>9</sub>  | 1.9302      |
| Ti <sub>10</sub>                     | O <sub>8</sub>  | 1.7426      | Ti <sub>10</sub>                                   | O <sub>8</sub>  | 1.7393      |
|                                      | O <sub>7</sub>  | 1.8324      |                                                    | O <sub>7</sub>  | 1.8439      |
| Ti <sub>14</sub>                     | O <sub>12</sub> | 1.939       | Ti <sub>14</sub>                                   | O <sub>12</sub> | 1.9273      |
| Ti <sub>9</sub>                      | O <sub>6</sub>  | 1.7887      | Ti <sub>9</sub>                                    | O <sub>6</sub>  | 1.795       |
|                                      | O <sub>7</sub>  | 1.7991      |                                                    | O <sub>7</sub>  | 1.7946      |
| Ti <sub>7</sub>                      | O <sub>10</sub> | 1.7682      | Ti <sub>7</sub>                                    | O <sub>10</sub> | 1.7705      |
|                                      | O <sub>6</sub>  | 1.8285      |                                                    | O <sub>6</sub>  | 1.8187      |
| Ti <sub>12</sub>                     | O <sub>9</sub>  | 1.7297      | Ti <sub>12</sub>                                   | O <sub>9</sub>  | 1.7349      |
|                                      | O <sub>10</sub> | 1.8764      |                                                    | O <sub>10</sub> | 1.8694      |

Table S2.:

| Compound                                                                                 | Composition         | Solvent                         | Standard           | Chemical shift, ppm      | Ref.      |
|------------------------------------------------------------------------------------------|---------------------|---------------------------------|--------------------|--------------------------|-----------|
| Ti <sub>14</sub> Cs <sub>2</sub>                                                         | Ti, Cs, C, O, N, H  | DMF                             | CsCl               | 9.64                     | This work |
| Ti <sub>12</sub> Cs                                                                      | Ti, Cs, C, O, N, H  | DMF                             | CsCl               | 11.7                     | 10        |
| Cs@Ti <sub>12</sub> Ser <sub>6</sub>                                                     | Ti, Cs, C, O, Cl, H | H <sub>2</sub> O                | CsCl               | 116.4                    | 11        |
| Cs@Ti <sub>7</sub> Cr <sub>14</sub>                                                      | Ti, Cs, Cr, C, O, H | CH <sub>2</sub> Cl <sub>2</sub> | CsCl               | -53.4                    | 6         |
| CsH <sub>7</sub> [Al <sub>8</sub> (pdc) <sub>8</sub> (OAc) <sub>8</sub> O <sub>4</sub> ] | Cs, Al, C, O, H     | DMSO                            | CsClO <sub>4</sub> | -26                      | 12        |
| Cs <sub>2</sub> (UO <sub>2</sub> )(Si <sub>2</sub> O <sub>6</sub> )                      | Cs, Si, C, O, H     | H <sub>2</sub> O                | CsCl               | 136.5, 61.4, 54.3, -13.5 | 13        |

Table S3.:

| Catalyst                         | Reaction conditions                                                                                        | Time, h | Conv., % | Yield, % | References                                                      |
|----------------------------------|------------------------------------------------------------------------------------------------------------|---------|----------|----------|-----------------------------------------------------------------|
| Ti <sub>14</sub> Cs <sub>2</sub> | Catalyst (50 mg); TBAB (0.5 mmol); epoxide (3 mmol); 1 atm CO <sub>2</sub> ; 20 °C; simulated solar light. | 23 h    | 100      | >99      | <i>This work</i>                                                |
| Ti <sub>14</sub> Cs <sub>2</sub> | Catalyst (50 mg); TBAB (0.5 mmol); epoxide (3 mmol); 1 atm CO <sub>2</sub> ; 80 °C; simulated solar light. | 14 h    | 100      | >99      | <i>This work</i>                                                |
| Ti <sub>12</sub> Cs              | Catalyst (50 mg); TBAB (0.5 mmol); epoxide (3 mmol); 1 atm CO <sub>2</sub> ; 50 °C; visible light.         | 7.5 h   | 100      | >99      | <i>Dalton Trans.</i> , <b>2024</b> , 53, 1989-1998              |
| Ti <sub>12</sub> Pb <sub>2</sub> | Catalyst (50 mg); TBAB (0.5 mmol); epoxide (3 mmol); 1 atm CO <sub>2</sub> ; 20 °C; visible light.         | 24 h    | 100      | >99      | <i>Dalton Trans.</i> , <b>2024</b> , 53, 3666-3674              |
| Ti <sub>14</sub>                 | Catalyst (50 mg); TBAB (0.5 mmol); epoxide (3 mmol); 1 atm CO <sub>2</sub> ; 20 °C; visible light.         | 30 h    | 100      | >99      | <i>Dalton Trans.</i> , <b>2024</b> , 53, 3666-3674              |
| Zn-NTTA                          | Catalyst (5 μmol); TBAB (0.3 mmol); epoxide (20 mmol); 10 bar CO <sub>2</sub> ; 100 °C.                    | 8 h     | -        | 98.2     | <i>ACS Appl. Mater. Interfaces</i> , <b>2016</b> , 8, 31746-56. |
| Al-N <sub>4</sub> -C             | Catalyst (20 mmol); TBAB (0.8 mmol); epoxide (0.67 mmol); DMF; 1 bar CO <sub>2</sub> ; visible light.      | 60 h    | -        | 80       | <i>Adv. Mater.</i> , <b>2021</b> , 33, 2103186.                 |
| MOF-801 (D)                      | Catalyst (0.6 mol%); TBAB (0.5 mol%); epoxide (19.2 mmol); 0.1 MPa CO <sub>2</sub> ; 80 °C.                | 15 h    | 92.4     | 92.4     | <i>J. Mater. Chem. A</i> , <b>2022</b> , 10, 10051-10061.       |
| V <sub>8</sub> -1                | Catalyst (2 mol %); TBAB (0.5 mmol,                                                                        | 16 h    | -        | >99      | <i>J. Am. Chem.</i>                                             |

|                                                                                                        |                                                                                                                                                |      |      |       |  |                                                                          |
|--------------------------------------------------------------------------------------------------------|------------------------------------------------------------------------------------------------------------------------------------------------|------|------|-------|--|--------------------------------------------------------------------------|
|                                                                                                        | 2.5 mol %); epoxide (28 mmol); CO <sub>2</sub> (0.5 Mpa); 70 °C.                                                                               |      |      |       |  | <i>Soc.</i> , <b>2019</b> , <i>141</i> , 19487–19497.                    |
| Ni–TCPE1                                                                                               | Catalyst (10 μmol; based on Ni); epoxide (20 mmol); TBAB (0.3 mmol); CO <sub>2</sub> (1 MPa), 100 °C.                                          | 12 h | -    | >99   |  | <i>J. Am. Chem. Soc.</i> , <b>2015</b> , <i>137</i> , 15066–15069.       |
| Mn-MOF                                                                                                 | Catalyst (10 mg); TBAB (0.028 mmol); epoxide (1.429 mmol); 1 bar CO <sub>2</sub> ; visible light; 80 °C.                                       | 24 h | -    | 90    |  | <i>ACS Omega</i> , <b>2022</b> , <i>7</i> , 9958-9963.                   |
| PMo <sub>12</sub> @Zr-Fc MOFs                                                                          | catalyst (5 mg, 10.26 wt%); TBAB (0.25 mmol); epoxide (12.5 mmol); 1 atm CO <sub>2</sub> ; 80 °C; 900 rpm.                                     | 8 h  | 80   | 86.77 |  | <i>Appl. Catal. B</i> , <b>2021</b> , <i>296</i> , 120329.               |
| CoPc/TiO <sub>2</sub>                                                                                  | Catalyst (100 mg); TBAB (0.1 mmol); epoxide (1.0 mmol); 1 bar CO <sub>2</sub> ; solvent (CH <sub>3</sub> CN+MeOH); 20 W white cold LED, 25 °C. | 24 h | 96.7 | 94    |  | <i>ACS Sustain. Chem. Eng.</i> , <b>2018</b> , <i>6</i> , 7799–7809.     |
| Bi-PCN-224                                                                                             | Catalyst (30 mg); TBAB (0.5 mmol); epoxide (4.5 mmol); 1 bar CO <sub>2</sub> ; 300 W Xenon lamp.                                               | 6 h  | >99  | -     |  | <i>ACS Catal.</i> , <b>2021</b> , <i>11</i> , 1988-1994.                 |
| {Cu <sub>4</sub> [(C <sub>57</sub> H <sub>32</sub> N <sub>12</sub> )(COO) <sub>8</sub> ]} <sub>n</sub> | Catalyst (0.2 mol%); TBAB (0.65 g, 10 mol %); CO <sub>2</sub> (1 atm); r.t.                                                                    | 48 h | -    | 96    |  | <i>J. Am. Chem. Soc.</i> , <b>2016</b> , <i>138</i> , 2142–2145.         |
| Au <sub>19</sub> Ag <sub>4</sub> (S-Adm) <sub>15</sub>                                                 | Catalyst (5 mg); TBAB (10 mol%); epoxide (0.3 mmol); 3 ml solvent; 60 °C.                                                                      | 24 h | -    | 78    |  | <i>Angew. Chem. Int. Ed.</i> , <b>2021</b> , <i>60</i> , 10573–10576.    |
| IHEP-9                                                                                                 | Catalyst (0.05 mmol); TBAB (0.5 mmol); epoxide (1 mmol); 1 bar CO <sub>2</sub> ; visible light; r.t.                                           | 12 h | -    | >99   |  | <i>Inorg. Chem.</i> , <b>2021</b> , <i>60</i> , 651-659.                 |
| Zr-MOF                                                                                                 | Catalyst (30 mg); TBAB (0.5 mmol); epoxide (4.5 mmol); 1 bar CO <sub>2</sub> ; Xe lamp; r.t.                                                   | 6 h  | >99  | -     |  | <i>ACS Catal.</i> , <b>2021</b> , <i>11</i> , 1988.                      |
| Ti <sub>18</sub> Bi <sub>4</sub>                                                                       | Catalyst (100 mg); TBAB (0.5 mmol); epoxide (3.0 mmol); 1 bar CO <sub>2</sub> ; Xe lamp, r.t.                                                  | 14 h | 100  | >99   |  | <i>ACS Catal.</i> , <b>2022</b> , <i>12</i> , 8202–8213.                 |
| BiNbO <sub>4</sub> /r-GO                                                                               | Catalyst (50 mg); TBAB (9 mg); epoxide (100 μl); CO <sub>2</sub> (1.48 MPa); 353 K.                                                            | 24 h | -    | 65    |  | <i>ACS Sustain. Chem. Engin.</i> , <b>2020</b> , <i>8</i> , 12072-12079. |
| NUC-38Yb                                                                                               | Catalyst (0.5 mol %); TBAB (4 mol%); epoxide (20 mmol); CO <sub>2</sub> (1 atm); 60 °C.                                                        | 10 h | -    | 96    |  | <i>ACS Catal.</i> , <b>2021</b> , <i>11</i> , 14916–14925.               |
